# Supplementary material for: Shape memory materials based on adamantane-containing polyurethanes
Source: Royal Society of Chemistry journal article supplement (doi:10.1039/c8ra05111a), 2018-01-01
Supplement: c8ra05111a2.pdf [file c8ra05111a2.pdf]

## Supporting Information

### Shape Memory Materials based on Adamantane-containing Polyurethanes

Faxing Zou, Heng Chen\*, Shuqin Fu, Shaojun Chen\*

*Shenzhen Key Laboratory of Functional Polymer, College of Chemistry and Environmental Engineering, Shenzhen University, Shenzhen, 518060, China.*

*Guangdong Research Center for Interfacial Engineering of Functional Materials; Shenzhen Key Laboratory of Special Functional Materials, College of Materials Science and Engineering, Shenzhen University, Shenzhen 518060, China.*

E-mail: polyhengchen@szu.edu.cn (for H. Chen); chensj@szu.edu.cn (for S. Chen);

**Keywords:** shape memory polymers; adamantane; polyurethanes

#### Testing procedure of shape-memory behaviours

Thermal-induced shape memory behaviors were investigated with DMA Q800 apparatus (TA, USA) in tensile mode with a preload force of 0.01 N, an oscillation amplitude of 5  $\mu\text{m}$  ( $< 0.18\%$ ), static stress/dynamic stress amplitude ratio (“force tracking”) of 80%, and an oscillation frequency of 1 Hz. Specimens were cut from the final ABPU film to feature dimensions of 15 mm  $\times$  5 mm  $\times$  0.4 mm. After loading each film specimen at room temperature under tensile stress, the temperature was ramped to 70  $^{\circ}\text{C}$  at a rate of 10  $^{\circ}\text{C}/\text{min}$ . ABPU was thermally equilibrated at 70  $^{\circ}\text{C}$  and stretched to 80% strain ( $\varepsilon_1$ ), elongated to a force of 1.6 N at a rate of 0.15 N/min (in tension); cooled to 10  $^{\circ}\text{C}$  at a rate of 10  $^{\circ}\text{C} \cdot \text{min}^{-1}$ , and then unloaded to 0 N using the same rate as before. The remaining strain was measured as  $\varepsilon_2$ . The specimen was then reheated to 70  $^{\circ}\text{C}$  at a ramp rate of 10  $^{\circ}\text{C}/\text{min}$ , and the final strain was recorded as

recovery strain,  $\varepsilon_3$ . All the above measurements of ABPUs were repeated three times for each specimen.

Multi-shape memory behaviours were evaluated via thermo-mechanical analysis using a TA Instruments (DMA800) and using tension clamps in controlled force mode, according to the procedure described in a literature [27]. All samples were dried at 80 °C in vacuum for 24 h and cut in rectangular pieces of approximately 15 mm × 4.0 mm × 0.5 mm. The detailed test setup of dual- and triple-shape-memory cycles are described as follows.

#### *Dual-shape memory cycle*

The sample was heated at *ca.* 100 °C and equilibrated for 10 min; (2) Uniaxial stretching was applied by ramping the force from 0.001 to 1 N with a rate of 0.1 N/min. The sample was then allowed to equilibrate for 1 min; (3) The strain was then fixed by rapid cooling to *ca.* 0 °C with a cooling rate (*q*) of -10 °C/min, followed by equilibration for 10 min; (4) The external force was then unloaded to 0 N with a rate of 0.15 N/min; (5) Finally, the sample was reheated to *ca.* 70 °C with a rate of 10 °C/min and followed by equilibration for 40 min.

#### *Triple-shape memory cycles.*

The sample was heated to 75 °C and equilibrated for 5 min; (2) Uniaxial stretching was applied by ramping the force from 0.001 N to 5 N at a rate of 0.15 N/min. The sample was then allowed to equilibrate for 3 min; (3) The strain was then fixed by rapid cooling to 55 °C at a cooling rate of -10 °C/min, followed by equilibration for 10 min; (4) The external force was unloaded to 0 N at a rate of 0.15 N/min first, and then uniaxial stretching was applied by ramping the force from 0.001 N to 10 N at same rate; (5) The strain was further fixed by rapid cooling to 0 °C with a cooling rate of -10 °C/min, followed by equilibration for 10 min; (6) The external force was unloaded to 0 N at a rate of 0.15 N/min; (7) The sample was reheated to 55 °C at a rate of 10 °C/min and followed by equilibration for 30 min; (8) Finally, the sample was reheated to 75 °C at a rate of 10 °C/min and followed by equilibration for 40 min.

**Table S1.** Tensile Properties of properties of ABPUs

| Samples | Break stress (MPa) | Break strain (%) | Yield stress (MPa) | Yield strain (%) | Tangent modulus (MPa) |
|---------|--------------------|------------------|--------------------|------------------|-----------------------|
| ABPU20  | 28.5               | 39.6             | 29.1               | 33.7             | 265.8                 |
| ABPU40  | 44.9               | 414.6            | 45.6               | 409.5            | 342.2                 |
| ABPU50  | 44.0               | 377.5            | 44.5               | 372.6            | 181.8                 |
| ABPU60  | 37.0               | 95.0             | 54.3               | 13.7             | 670.8                 |
| ABPU80  | 11.9               | 94.2             | 11.2               | 15.4             | 152.5                 |

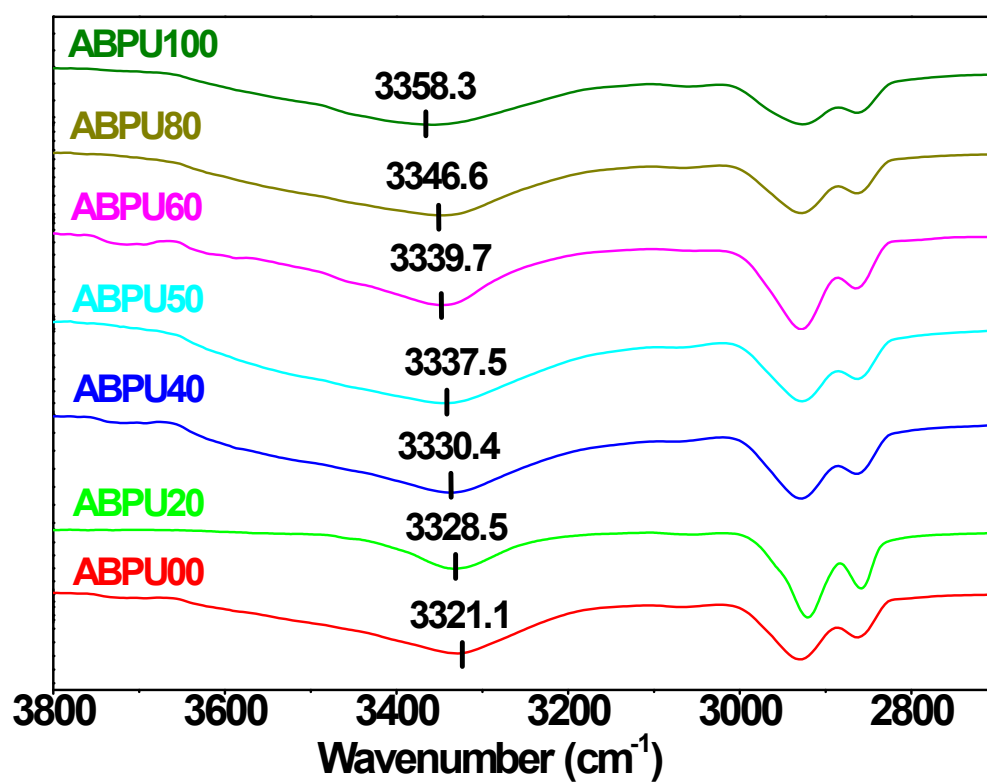

**Fig. S1** Partial enlargement FT-IR spectra of ABPUs.
